# Supplementary material for: A Stat1 bound enhancer promotes Nampt expression and function within tumor associated macrophages
Source: PubMed Central journal article supplement (PMC8113251; doi:10.1038/s41467-021-22923-5), 2021-05-11
Supplement: 41467_2021_22923_MOESM2_ESM.pdf [file 41467_2021_22923_MOESM2_ESM.pdf]

## Descriptions of Additional Supplementary Files

### **Supplementary Data 1**

**Description:** scRNASeq Marker Gene Expression for Tumor Immune Cell Cluster Assignment. A full description of the marker genes used to assign clusters, including expression level, frequency, and significance.

### **Supplementary Data 2**

**Description:** GO Analysis of Differentially expressed genes in WT scRNASeq Clusters.

### **Supplementary Data 3**

**Description:** GO Analysis of Differentially expressed genes in NRE1-KO scRNASeq Clusters.
